# Supplementary material for: N/S co-doped coal-based porous carbon spheres as electrode materials for high performance supercapacitors
Source: Royal Society of Chemistry journal article supplement (doi:10.1039/d0ra00458h), 2020-01-01
Supplement: d0ra00458h1.pdf [file d0ra00458h1.pdf]

# Supporting Information

## **N/S co-doped coal-based porous carbon spheres as electrode materials for high performance supercapacitors**

Yan Lv, Jingjing Chen, Wei Jia, Xueyan Wu, Jixi Guo,\* Lili Ding, Dianzeng Jia,\* Fenglian Tong

Key Laboratory of Energy Materials Chemistry, Ministry of Education; Key Laboratory of Advanced Functional Materials, Autonomous Region; Institute of Applied Chemistry, Xinjiang University Urumqi, 830046 China E-mail: [jxguo1012@163.com](mailto:jxguo1012@163.com); [jdz@xju.edu.cn](mailto:jdz@xju.edu.cn).

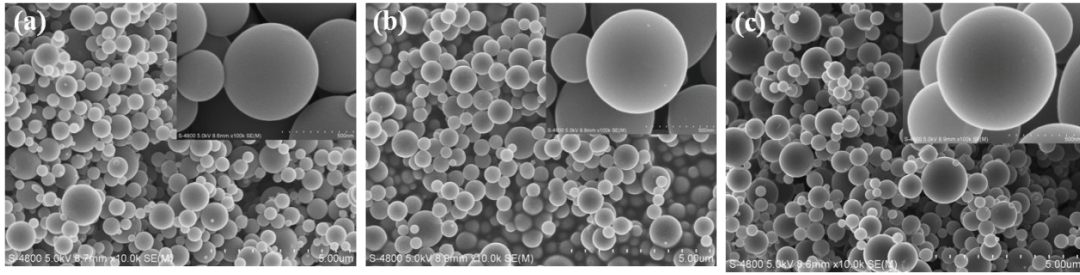

Fig S1. Morphology of samples. (a) SEM image of the PCSs, (b) SEM image of the NSPCSs-1, (c) SEM image of the NSPCSs-5.

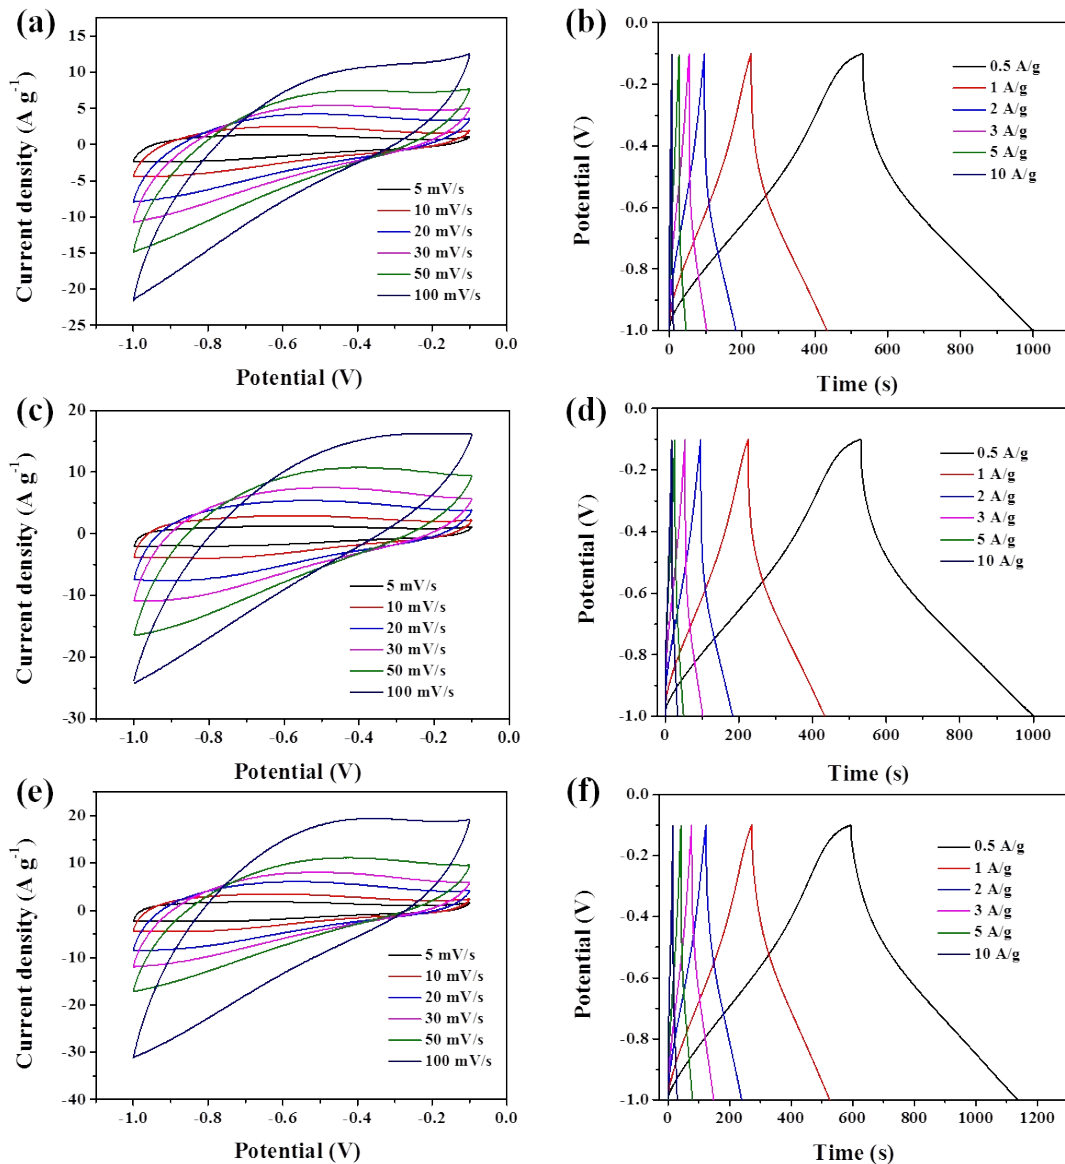

Fig S2. The CV curves at different scan rates (a,c,e) and galvanostatic charge-discharge curves (b,d,f) for the samples. The upper, middle and lower lines are the results of the PCSs, NSPCSs-1 and NSPCSs-5, respectively.

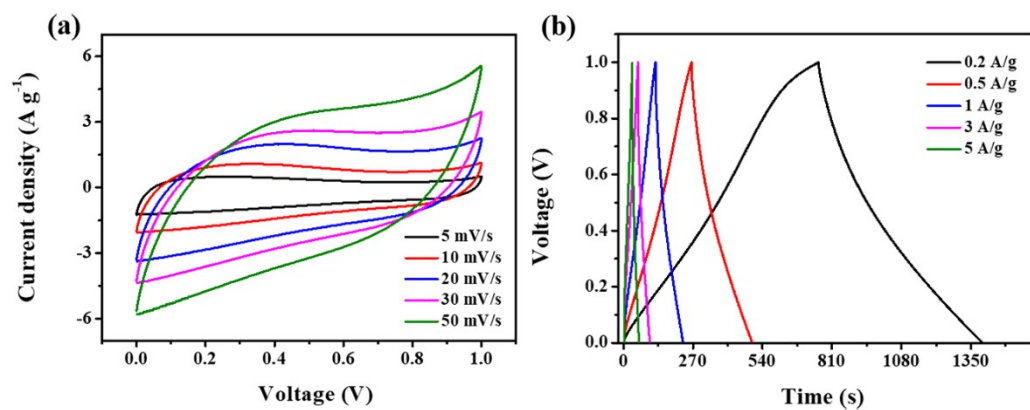

Fig S3. Electrochemical performance of NSPCSs-3 measured in 6 M KOH electrolyte in two electrode system. (a) CV profiles. (b) Galvanostatic charge-discharge profiles.

**Table S1.** The electrochemical performances of coal-based materials and N/S-doped carbon materials for supercapacitors in 6.0 M KOH.

| Electrode materials                                            | Specific Capacitance (F g <sup>-1</sup> ) | Current Density (A g <sup>-1</sup> ) | Cycle lifetime                       | reference                                  |
|----------------------------------------------------------------|-------------------------------------------|--------------------------------------|--------------------------------------|--------------------------------------------|
| Porous carbon (coal)                                           | 258                                       | 1.0                                  | 1000 cycles at 2 A g <sup>-1</sup>   | Mater. Letters, 2015, 149, 85.             |
| Hierarchical porous carbon nanofibers (coal)                   | 220.3                                     | 1.0                                  | 20000 cycles at 10 A g <sup>-1</sup> | RSC Adv., 2019, 9, 6184                    |
| Coal/PAN interconnected carbon nanofibers                      | 259.7                                     | 1.0                                  | 70000 cycles at A g <sup>-1</sup>    | Electro. Acta., 2016, 194, 239             |
| Coal-derived porous carbon fibers                              | 170.0                                     | 1.0                                  | 20000 cycles at 2 A g <sup>-1</sup>  | J. Mater. Chem. A, 2015, 3, 21178          |
| N/S-doped carbon                                               | 281.2                                     | 1.0                                  | 6000 cycles at 1 A g <sup>-1</sup>   | J. Electrochem. Soc., 2016, 163, 2991.     |
| N/S co-doped hierarchically porous carbon                      | 272                                       | 1.0                                  | 5000 cycles at 1 A g <sup>-1</sup>   | J. Power Sources, 2018, 387, 81            |
| Nitrogen/Sulfur-Codoped Hierarchically Porous Carbon Materials | 302                                       | 1.0                                  | 5000 cycles at 1 A g <sup>-1</sup>   | ACS Appl. Mater. Interfaces 2017, 9, 26088 |
| <b>N/S co-doped coal-based porous carbon spheres</b>           | 308                                       | 1.0                                  | 10000 cycles at 1 A g <sup>-1</sup>  | This work                                  |
